# Supplementary material for: Progress of Home-Based Food Allergy Treatment during the Coronavirus Disease Pandemic in Japan: A Cross-Sectional Multicenter Survey
Source: MDPI journal article supplement (doi:10.3390/children8100919), 2021-10-15
Supplement: s1 [file s1]

**Supplementary Table S1.** Surveyed Hospitals

| No    | Hospital lists                             | Location | Analyzed<br>Number (%) |
|-------|--------------------------------------------|----------|------------------------|
| 1     | Hyogo Prefectural Kobe Children's Hospital | Hyogo    | 70 (5.3%)              |
| 2     | Kansai Medical University Hospital         | Osaka    | 71 (5.4%)              |
| 3     | Kindai University Hospital                 | Osaka    | 46 (3.5%)              |
| 4     | Higashiosaka City Medical Center           | Osaka    | 37 (2.8%)              |
| 5     | Izumi City General Hospital                | Osaka    | 14 (1.1%)              |
| 6     | Sumitomo Hospital                          | Osaka    | 57 (4.3%)              |
| 7     | Japanese Osaka Red Cross Hospital          | Osaka    | 21 (1.6%)              |
| 8     | Matsushita Memorial Hospital               | Osaka    | 1 (0.1%)               |
| 9     | Yamatotakada Municipal Hospital            | Nara     | 34 (2.6%)              |
| 10    | Takatsuki General Hospital                 | Osaka    | 74 (5.6%)              |
| 11    | Kobe City Medical Center General Hospital  | Hyogo    | 51 (3.9%)              |
| 12    | Osaka Saiseikai Nakatsu Hospital           | Osaka    | 155 (11.8%)            |
| 13    | Yao Municipal Hospital                     | Osaka    | 78 (5.9%)              |
| 14    | Kobe City Medical Center West Hospital     | Hyogo    | 11 (0.8%)              |
| 15    | PL Hospital                                | Osaka    | 6 (0.5%)               |
| 16    | Kokuho Chuo Hospital                       | Nara     | 122 (9.3%)             |
| 17    | Nara City Hospital                         | Nara     | 38 (2.9%)              |
| 18    | Hoshigaoka Medical Center                  | Osaka    | 5 (0.4%)               |
| 19    | Abeno Medical Clinic                       | Osaka    | 13 (1.0%)              |
| 20    | Kaizuka City Hospital                      | Osaka    | 60 (4.6%)              |
| 21    | Osaka Police Hospital                      | Osaka    | 9 (0.7%)               |
| 22    | Nara Prefecture General Medical Center     | Nara     | 15 (1.1%)              |
| 23    | Osaka Habikino Medical Center              | Osaka    | 306 (23.3%)            |
| 24    | Shimizu Family Clinic                      | Osaka    | 21 (1.6%)              |
| Total |                                            |          | 1315                   |

Data are presented as the number and percentage of the parents.
